# Supplementary material for: Improving the performance of a titanium carbide MXene in supercapacitors by partial oxidation treatment
Source: Royal Society of Chemistry journal article supplement (doi:10.1039/c9qi01588d), 2020-01-01
Supplement: c9qi01588d1.pdf [file c9qi01588d1.pdf]

## Supporting information

### Improving the Performance of Titanium Carbide MXene in Supercapacitor by Partial Oxidation Treatment

Miao Zhang,<sup>a</sup> Xifan Chen,<sup>a</sup> Jinyi Sui,<sup>a</sup> Bahreselam Sielu Abraha,<sup>a</sup> Yang Li,<sup>a</sup> Wenchao Peng,<sup>a</sup> GuoLiang Zhang,<sup>a</sup> Fengbao Zhang,<sup>a</sup> and Xiaobin Fan<sup>\*a</sup>

<sup>a</sup>School of Chemical Engineering and Technology, Tianjin University, Tianjin 300072, China

\*E-mail: [xiaobinfan@tju.edu.cn](mailto:xiaobinfan@tju.edu.cn)

#### Contents:

|                                                                                                                                       |        |
|---------------------------------------------------------------------------------------------------------------------------------------|--------|
| Figure S1. CV curves of the different Ti <sub>3</sub> C <sub>2</sub> T <sub>x</sub> samples                                           | pag. 2 |
| Table S1. ICP analysis results of the Al in the Ti <sub>3</sub> AlC <sub>2</sub> and Ti <sub>3</sub> C <sub>2</sub> T <sub>x</sub>    | pag. 2 |
| Figure S2. HRTEM image of the F-Ti <sub>3</sub> C <sub>2</sub> T <sub>x</sub> sample                                                  | pag. 2 |
| Figure S3. XPS survey spectra the different Ti <sub>3</sub> C <sub>2</sub> T <sub>x</sub> samples                                     | pag. 3 |
| Figure S4. The cycling stability of P-Ti <sub>3</sub> C <sub>2</sub> T <sub>x</sub> in range of -0.55V ~ 0.2V                         | pag. 4 |
| Figure S5. CV curves of the F-Ti <sub>3</sub> C <sub>2</sub> T <sub>x</sub> sample from -0.55 to 0.2 V                                | pag. 4 |
| Figure S6. CV curves of the P-Ti <sub>3</sub> C <sub>2</sub> T <sub>x</sub> sample from -0.55 to 0.2 V                                | pag.4  |
| Figure S7. The BET of the P-Ti <sub>3</sub> C <sub>2</sub> T <sub>x</sub> and F-Ti <sub>3</sub> C <sub>2</sub> T <sub>x</sub> samples | pag.5  |
| Figure S8. Nyquist plots for the different Ti <sub>3</sub> C <sub>2</sub> T <sub>x</sub> electrodes                                   | pag.5  |
| Figure S9. Cycle life performance of the Ti <sub>3</sub> C <sub>2</sub> T <sub>x</sub> electrode                                      | pag. 6 |
| Table S2. Performance comparison of the electrochemical supercapacitors                                                               | pag. 6 |
| Reference                                                                                                                             | pag. 6 |

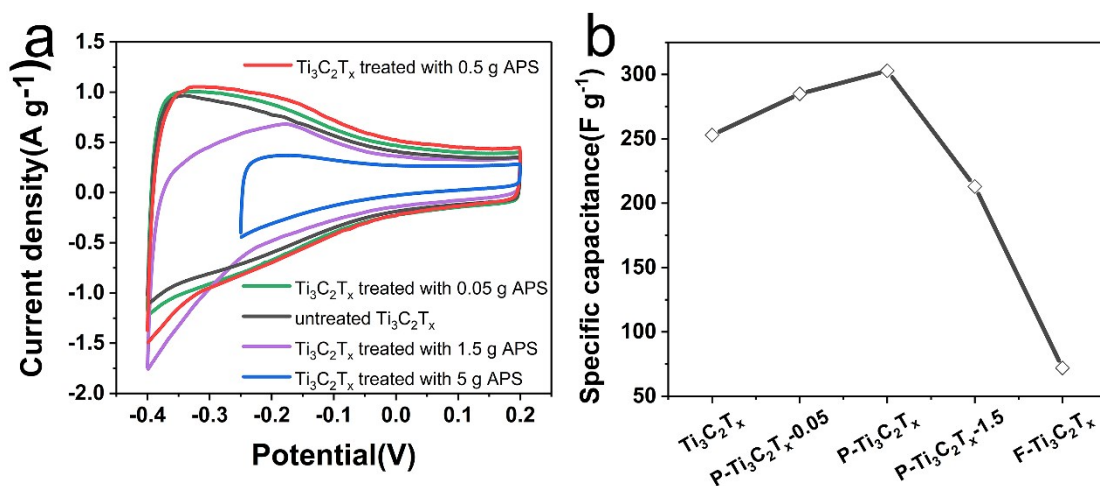

**Figure S1.** CV curves of the different  $\text{Ti}_3\text{C}_2\text{T}_x$  samples at  $2 \text{ mV s}^{-1}$ . 50 mL of  $4 \text{ mg mL}^{-1}$   $\text{Ti}_3\text{C}_2\text{T}_x$  was treated with 0.5, 0.05, 1.5, 5 g ammonium persulfate, respectively. (b) the specific capacitance of the different  $\text{Ti}_3\text{C}_2\text{T}_x$  samples.

**Table S1.** ICP analysis results of the Al in the  $\text{Ti}_3\text{AlC}_2$  and  $\text{Ti}_3\text{C}_2\text{T}_x$ .

| sample                            | Al (mg/kg) | wt. %  |
|-----------------------------------|------------|--------|
| $\text{Ti}_3\text{AlC}_2$         | 128428     | 12.843 |
| $\text{Ti}_3\text{C}_2\text{T}_x$ | 7954       | 0.795  |

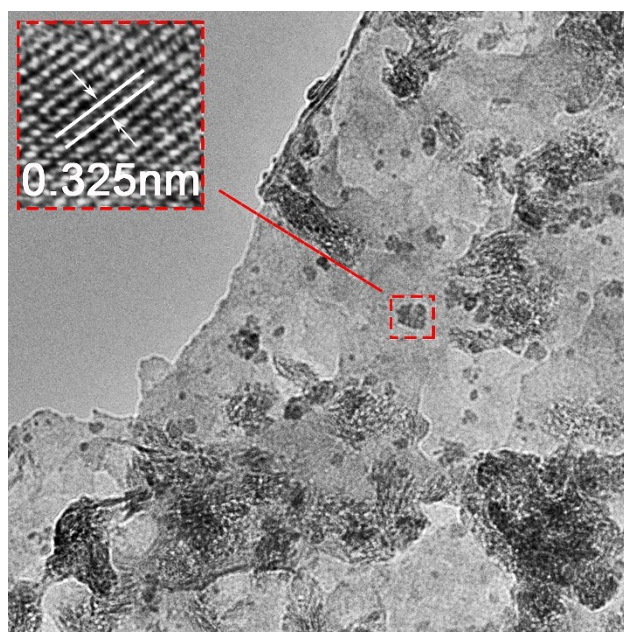

**Figure S2.** HRTEM image of the F- $\text{Ti}_3\text{C}_2\text{T}_x$  sample.

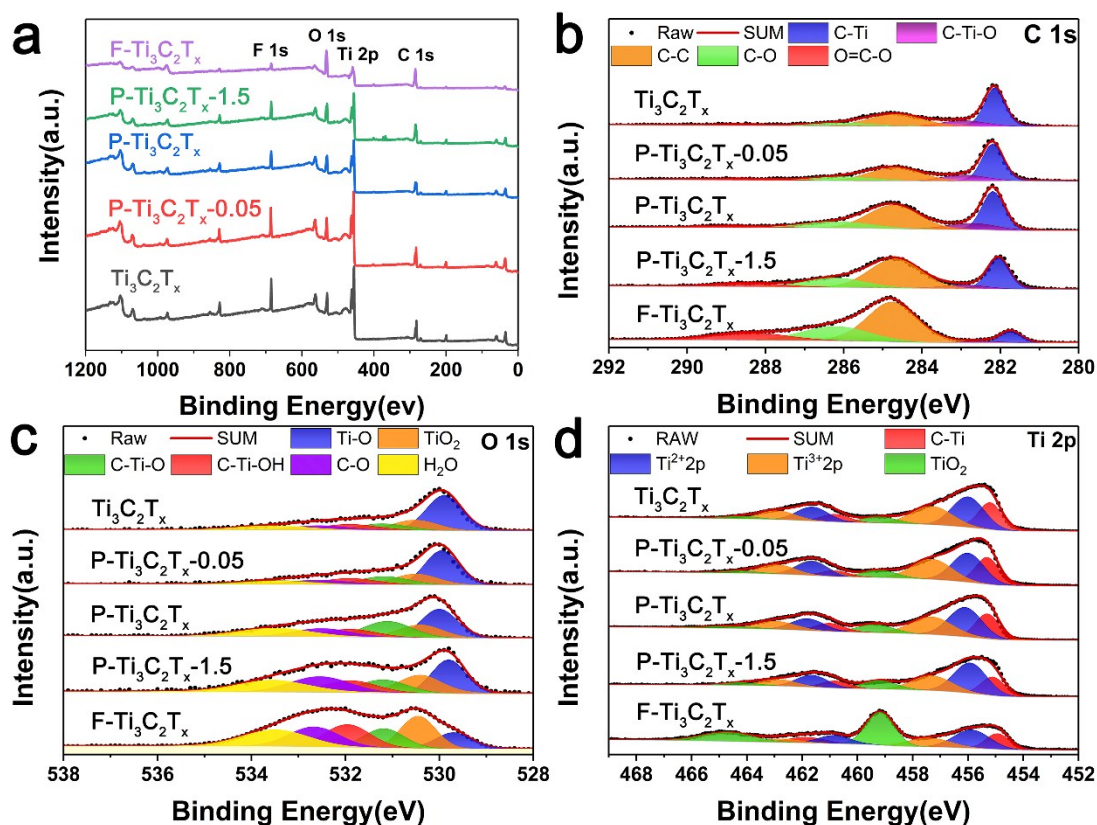

**Figure S3.** (a) XPS survey spectra of  $\text{Ti}_3\text{C}_2\text{T}_x$ ,  $\text{P-Ti}_3\text{C}_2\text{T}_x-0.05$ ,  $\text{P-Ti}_3\text{C}_2\text{T}_x$ ,  $\text{P-Ti}_3\text{C}_2\text{T}_x-1.5$  and  $\text{F-Ti}_3\text{C}_2\text{T}_x$ . High-resolution C 1s (b), O 1s (c), and Ti 2p (d) XPS spectra of  $\text{Ti}_3\text{C}_2\text{T}_x$ ,  $\text{P-Ti}_3\text{C}_2\text{T}_x-0.05$ ,  $\text{P-Ti}_3\text{C}_2\text{T}_x$ ,  $\text{P-Ti}_3\text{C}_2\text{T}_x-1.5$  and  $\text{F-Ti}_3\text{C}_2\text{T}_x$  samples.

High-resolution C 1s spectra (Figure S3b) and Ti 2p spectra (Figure S3d) reveals that the C–Ti signal of  $\text{P-Ti}_3\text{C}_2\text{T}_x-0.5$  and  $\text{P-Ti}_3\text{C}_2\text{T}_x$  had no significant change, but the intensity of C–Ti signal obviously decreased in the  $\text{P-Ti}_3\text{C}_2\text{T}_x-0.5$  and  $\text{F-Ti}_3\text{C}_2\text{T}_x$  samples after treatment with excessive ammonium persulfate. Meanwhile, the high-resolution O 1s spectra (Figure S3c) and Ti 2p spectra (Figure S3d) show a much stronger  $\text{TiO}_2$  peak in  $\text{F-Ti}_3\text{C}_2\text{T}_x$ , when compared with untreated  $\text{Ti}_3\text{C}_2\text{T}_x$ . In particular, in Figure S3c, the high-resolution O 1s spectra of the partially oxidized  $\text{Ti}_3\text{C}_2\text{T}_x$  possessed a much stronger C–Ti–O signal, confirming that the –O terminal could be formed in the partial oxidation treatment method.

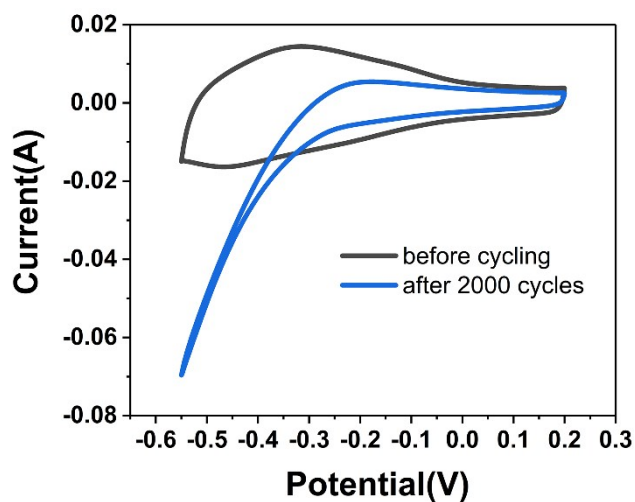

**Figure S4.** The cycling stability of P-Ti<sub>3</sub>C<sub>2</sub>T<sub>x</sub> in range of -0.55V ~ 0.2V at 5 mV s<sup>-1</sup>.

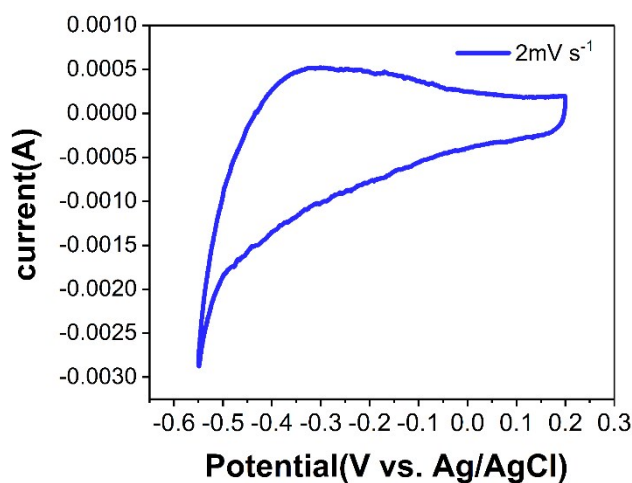

**Figure S5.** CV curves of the F-Ti<sub>3</sub>C<sub>2</sub>T<sub>x</sub> sample from -0.55 to 0.2 V. Obvious hydrogen evolution reaction can be observed in F-Ti<sub>3</sub>C<sub>2</sub>T<sub>x</sub> electrode near -0.4 V.

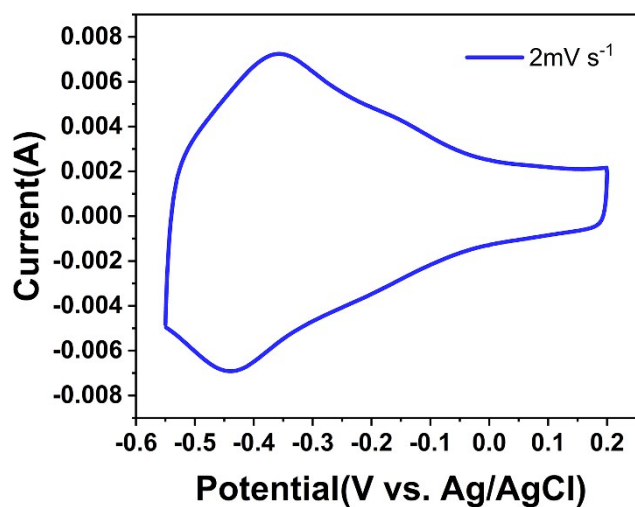

**Figure S6.** CV curves of the P-Ti<sub>3</sub>C<sub>2</sub>T<sub>x</sub> sample from -0.55 to 0.2 V. It is noted that no hydrogen

evolution reaction could be observed near  $-0.4$  V.

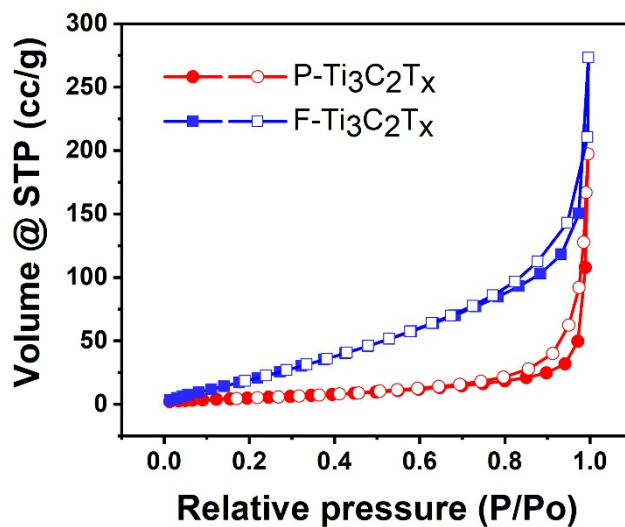

**Figure S7.** The nitrogen adsorption and desorption isotherms of the P-Ti<sub>3</sub>C<sub>2</sub>T<sub>x</sub> and F-Ti<sub>3</sub>C<sub>2</sub>T<sub>x</sub> samples.

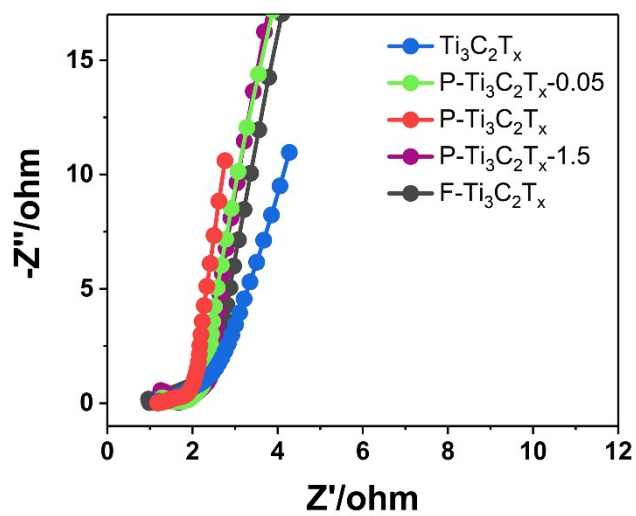

**Figure S8.** Nyquist plots for the different Ti<sub>3</sub>C<sub>2</sub>T<sub>x</sub> electrodes at open circuit potentials.

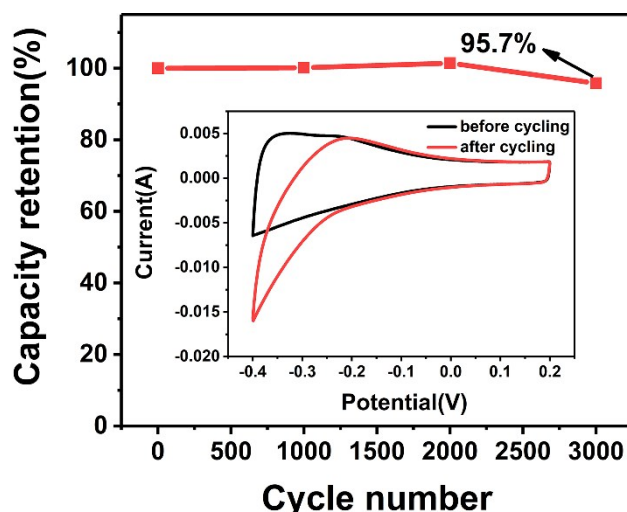

**Figure S9.** Cycle life performance of the  $\text{Ti}_3\text{C}_2\text{T}_x$  electrode in 1 M  $\text{H}_2\text{SO}_4$  electrolyte at  $500 \text{ mV s}^{-1}$ .

The inset shows the CV curves before and after cycling at  $5 \text{ mV s}^{-1}$ .

**Table S2.** Performance comparison of the electrochemical supercapacitors with other works.

| Electrode material                                       | Electrolyte                 | Capacitance         | Cycling stability           | Ref.         |
|----------------------------------------------------------|-----------------------------|---------------------|-----------------------------|--------------|
| P- $\text{Ti}_3\text{C}_2\text{T}_x$                     | 1 M $\text{H}_2\text{SO}_4$ | 303 F/g (2 mV/s)    | 96.6%/9000 cycles           | In this work |
| $\text{TiO}_2$ - $\text{Ti}_3\text{C}_2$                 | 6 M KOH                     | 143 F/g (5 mV/s)    | 96%/3000 cycles             | 1            |
| $\text{Ti}_3\text{C}_2\text{T}_x$ (via Alkali Treatment) | 1 M $\text{H}_2\text{SO}_4$ | 314 F/g (2 mV/s)    | 89.1%/10 000 cycles         | 2            |
| $\text{Ti}_3\text{C}_2\text{T}_x$                        | 1 M $\text{H}_2\text{SO}_4$ | 150 F/g (2 mV/s)    | No reported                 | 3            |
| $\text{Ti}_3\text{C}_2\text{T}_x$ -15M                   | 1 M $\text{H}_2\text{SO}_4$ | 192 F/g (2 mV/s)    | No reported                 | 4            |
| PANI@ $\text{TiO}_2$ / $\text{Ti}_3\text{C}_2\text{T}_x$ | 1 M KOH                     | 188.3 F/g (10 mV/s) | 94%/8000 cycles             | 5            |
| $\text{Ti}_3\text{C}_2$ film                             | 3 M $\text{H}_2\text{SO}_4$ | 210 F/g (10 V/s)    | 90%/10000 cycles            | 6            |
| $\text{Ti}_3\text{C}_2$ / $\text{TiO}_2$ -nanowires      | 6 M KOH                     | 143 F/g (2 mV/s)    | 88%/6000 cycles             | 7            |
| hydrazine-treated $\text{Ti}_3\text{C}_2\text{T}_x$      | 1 M $\text{H}_2\text{SO}_4$ | 250 F/g (2 mV/s)    | $\approx$ 100%/10000 cycles | 8            |
| Functionalized- $\text{Ti}_3\text{C}_2$                  | 1M KOH                      | 160 F/g (5 mV/s)    | 91%/10000 cycles            | 9            |

## Reference

- JianFeng Zhu, Yi Tang, ChenHui Yang, Fen Wang, and MinJuan Cao, Composites of  $\text{TiO}_2$  Nanoparticles Deposited on  $\text{Ti}_3\text{C}_2$  MXene Nanosheets with Enhanced Electrochemical Performance, *J. Electrochem. Soc.*, 2016,**163**,A785-A791.
- T. Li, L. Yao, Q. Liu, J. Gu, R. Luo, J. Li, X. Yan, W. Wang, P. Liu, B. Chen, W. Zhang, W. Abbas, R. Naz and D. Zhang, Fluorine-Free Synthesis of High-Purity  $\text{Ti}_3\text{C}_2\text{T}_x$ (T=OH, O) via Alkali Treatment, *Angew. Chem.-Int. Edit.*, 2018, **57**, 6115-6119.
- Y. Dall'Agnese, M. R. Lukatskaya, K. M. Cook, P.-L. Taberna, Y. Gogotsi and P. Simon, High capacitance of surface-modified 2D titanium carbide in acidic electrolyte, *Electrochem.*

- Commun.*, 2014, **48**, 118-122.
4. M. Hu, T. Hu, Z. Li, Y. Yang, R. Cheng, J. Yang, C. Cui and X. Wang, Surface Functional Groups and Interlayer Water Determine the Electrochemical Capacitance of  $Ti_3C_2T_x$  MXene, *ACS Nano*, 2018, **12**, 3578-3586.
  5. X. Lu, J. Zhu, W. Wu and B. Zhang, Hierarchical architecture of PANI@TiO<sub>2</sub>/Ti<sub>3</sub>C<sub>2</sub>T<sub>x</sub> ternary composite electrode for enhanced electrochemical performance, *Electrochim. Acta*, 2017, **228**, 282-289.
  6. M. R. Lukatskaya, S. Kota, Z. Lin, M.-Q. Zhao, N. Shpigel, M. D. Levi, J. Halim, P.-L. Taberna, M. W. Barsoum, P. Simon and Y. Gogotsi, Ultra-high-rate pseudocapacitive energy storage in two-dimensional transition metal carbides, *Nature Energy*, 2017, **2**, 17105.
  7. M. J. Cao, F. Wang, L. Wang, W. L. Wu, W. J. Lv and J. F. Zhu, Room Temperature Oxidation of Ti<sub>3</sub>C<sub>2</sub> MXene for Supercapacitor Electrodes, *J. Electrochem. Soc.*, 2017, **164**, A3933-A3942.
  8. O. Mashtalir, M. R. Lukatskaya, A. I. Kolesnikov, E. Raymundo-Pinero, M. Naguib, M. W. Barsoum and Y. Gogotsi, The effect of hydrazine intercalation on the structure and capacitance of 2D titanium carbide (MXene), *Nanoscale*, 2016, **8**, 9128-9133.
  9. H. Wang, J. Zhang, Y. Wu, H. Huang and Q. Jiang, Chemically functionalized two-dimensional titanium carbide MXene by in situ grafting-intercalating with diazonium ions to enhance supercapacitive performance, *J. Phys. Chem. Solids*, 2018, **115**, 172-179.
